# Supplementary material
Source: Springer Nature journal article supplement (https://www.springermedizin.de/resource/supplementary/13020_2010_91_MOESM2_ESM.pdf/9640958)
Supplement: MOESM2 [file 9640958]

**A** EST, PM values before EA (X)

|                 | 1    | 2    | 3    | 4    | 5    | 6    | 7    | Freq<br>( $y_i$ ) | CF<br>$C(Y)i$ | CRF  |
|-----------------|------|------|------|------|------|------|------|-------------------|---------------|------|
| 7               |      |      |      |      | 1    |      |      | 1                 | 22            | 1.00 |
| 6               |      |      |      |      |      |      |      | 0                 | 21            | 0.95 |
| 5               |      |      | 3    |      |      | 1    |      | 4                 | 21            | 0.95 |
| 4               |      |      | 1    | 5    |      |      |      | 6                 | 17            | 0.77 |
| 3               |      |      | 5    | 3    | 1    |      |      | 9                 | 11            | 0.50 |
| 2               |      |      | 1    |      |      |      |      | 1                 | 2             | 0.09 |
| 1               | 1    |      |      |      |      |      |      | 1                 | 1             | 0.05 |
| Freq, ( $x_i$ ) | 1    | 0    | 10   | 8    | 2    | 1    | 0    | <b>22</b>         |               |      |
| CF, $C(X)i$     | 1    | 1    | 11   | 19   | 21   | 22   | 22   |                   |               |      |
| CRF             | 0.05 | 0.05 | 0.50 | 0.86 | 0.95 | 1.00 | 1.00 |                   |               |      |

**B** EST, PM values before EA

|      | 1    | 2    | 3    | 4    | 5    | 6    | 7    | 8    | Freq      | CF | CRF  |
|------|------|------|------|------|------|------|------|------|-----------|----|------|
| 8    |      |      |      |      |      |      | 3    |      | 3         | 21 | 1.00 |
| 7    |      |      |      |      | 1    | 4    |      |      | 5         | 18 | 0.86 |
| 6    |      |      |      | 1    | 1    | 1    | 1    |      | 4         | 13 | 0.62 |
| 5    |      |      |      | 2    | 2    |      |      |      | 4         | 9  | 0.43 |
| 4    |      |      |      | 1    |      |      |      |      | 1         | 5  | 0.24 |
| 3    |      | 1    |      | 3    |      |      |      |      | 4         | 4  | 0.19 |
| 2    |      |      |      |      |      |      |      |      | 0         | 0  | 0.00 |
| 1    |      |      |      |      |      |      |      |      | 0         | 0  | 0.00 |
| Freq | 0    | 1    | 0    | 7    | 4    | 5    | 4    | 0    | <b>21</b> |    |      |
| CF   | 0    | 1    | 1    | 8    | 12   | 17   | 21   | 21   |           |    |      |
| CRF  | 0.00 | 0.05 | 0.05 | 0.38 | 0.57 | 0.81 | 1.00 | 1.00 |           |    |      |
